# Supplementary material
Source: PubMed Central journal article supplement (PMC4019149)
Supplement: IAI.01647-14_zii999090666so1.pdf [file IAI.01647-14_zii999090666so1.pdf]

# Suppl. Fig 1

**A**

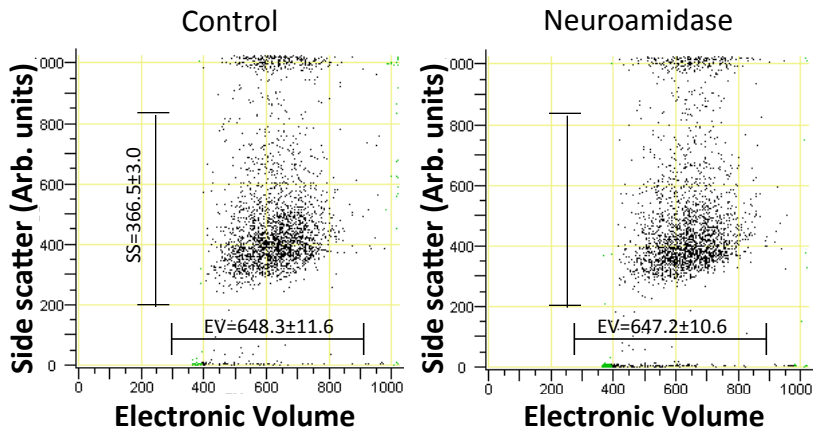

**B**

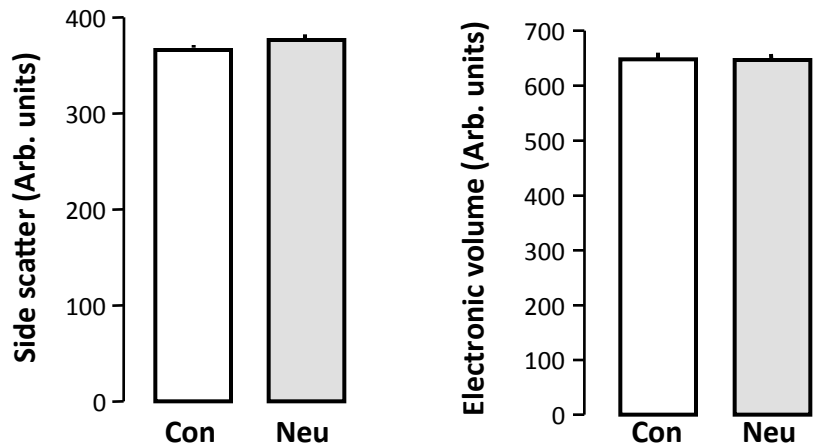

## Supplementary figure 1

Neuraminidase treatment does not alter erythrocyte volume. Human erythrocytes treated with or without neuroamidase ( $60 \text{ mU ml}^{-1}$ ) for 60 minutes, washed, and investigated in a flow cytometer. **(A)** Representative experiments show side scatter (SS) as a function of electronic volume (EV) from 2500 cells during control conditions (left side image) and after neuroamidase treatment (right side image). **(B)** Mean values  $\pm$  SEM of side scatter and electronic volume from 4 experiments are shown in each image.
